# Supplementary material for: A novel liquid crystal sensing platform for highly selective UO22+ detection based on a UO22+-specific DNAzyme
Source: Royal Society of Chemistry journal article supplement (doi:10.1039/d1ay01299a), 2021-01-01
Supplement: d1ay01299a1.pdf [file d1ay01299a1.pdf]

## Electronic Supplementary information

*for*

### A novel liquid crystal sensing platform for highly selective $\text{UO}_2^{2+}$ detection based on $\text{UO}_2^{2+}$ -specific DNAzyme

Congcong Hu<sup>1</sup>, Ping Li<sup>2</sup>, Zhaoyang Wu<sup>2</sup>, Fengfei Fan<sup>1</sup>, Duo Qian<sup>1</sup>, Yuxin Yi<sup>1</sup>,  
Shengyuan Yang<sup>1\*</sup>, Fubing Xiao<sup>1,2\*</sup>

1. College of Public Health, Hengyang Medical School, University of South China, Hengyang, Hunan, 421001, People's Republic of China.

2. State Key Laboratory of Chemo/Biosensing and Chemometrics, College of Chemistry and Chemical Engineering, Hunan University, Changsha 410082, People's Republic of China.

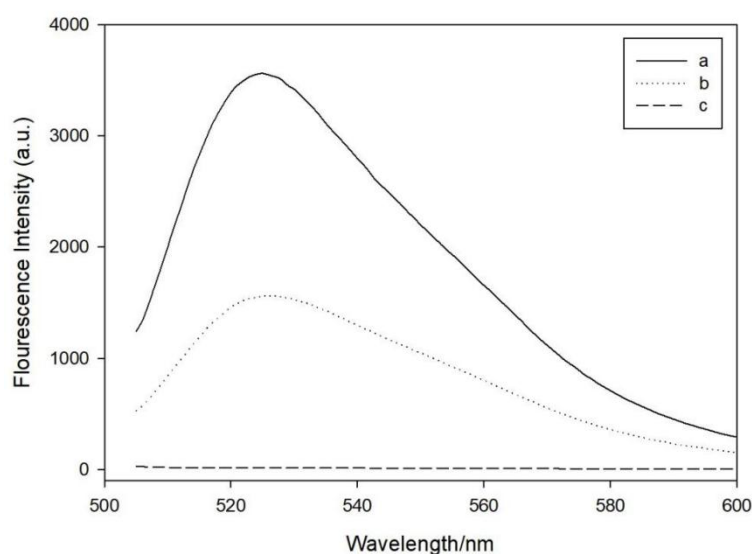

**Fig. S1** Fluorescence spectra of 80 nM DNAzyme with different concentrations of  $\text{UO}_2^{2+}$ : (a) 0 nM; (b) 80  $\mu\text{M}$ ; (c) 800  $\mu\text{M}$ .

**Table 1** Nucleic acid sequences used in the experiment

| Note          | Sequence (5'-3')                                                                 |
|---------------|----------------------------------------------------------------------------------|
| Capture probe | ATAGTGAGTCCAATTCCATCTCTTCCCCCAA-(CH <sub>2</sub> ) <sub>6</sub> -NH <sub>2</sub> |
| 39E           | CCATCTCTGCAGTCGGGTAGTTAAACCGACCTTCAGACATAGTGAGT                                  |
| 39DS          | AATTGGACTCACTAT rA GGAAGAGATGGAATTGG                                             |

**Table 2** Comparison of this method with the proposed methods in the literature for  $\text{UO}_2^{2+}$ 

| Analytical method          | Materials <sup>a</sup>                                                        | LOD                | Reference |
|----------------------------|-------------------------------------------------------------------------------|--------------------|-----------|
| Ratiometric fluorescence   | Dual-color CDs                                                                | 0.73 $\mu\text{M}$ | [1]       |
| Fluorescence               | Ln-BTC-AC-FM MOFs                                                             | 4.12 $\mu\text{M}$ | [2]       |
| Fluorescence               | Triphenylamine-based fluorescent sensor (USC-001)                             | 50 nM              | [3]       |
| Electrochemical techniques | AgNDs-ERGO/ITO                                                                | 0.85 $\mu\text{M}$ | [4]       |
| Electrochemical techniques | FePt/ZnIn <sub>2</sub> S <sub>4</sub> core-shell semiconductor nanostructures | 71.7 nM            | [5]       |
| Colorimetry                | $\text{UO}_2^{2+}$ peroxidase mimic                                           | 0.5 $\mu\text{M}$  | [6]       |
| DNAzyme-based LC biosensor | LCs, DNAzyme                                                                  | 25nM               | This work |

<sup>a</sup> CDs, carbon dots; MOFs, metal-organic frameworks; AgNDs, Ag nanodendrites; ERGO, electrochemically reduced graphene oxide; ITO, Indium Tin Oxide

## References

- 1 J. J. Qian, N. N. Cao, J. Zhang, J. J. Hou, Q. Chen, C. Zhang, Y. D. Sun, S. J. Liu, L. F. He, K. Zhang, H. B. Zhou, *Chinese Chem Lett.*, 2020, **31**(11), 2925-2928
- 2 M. Wang, G. Zeng, X. Zhang, F. Y. Bai, Y. H. Xing, Z. Shi, *J Mol Struct.*, 2021, **1238**, 13042
- 3 M. Zheng, Q. Yin, D. Y. Wang, Z. X. Zhao, Q. H. Hu, H. Q. Wang, *Microchem J.*, 2021, **167**, 106302.
- 4 W. H. Guo, H. L. Xu, X. H. Cao, J. G. Ma, Y. H. Liu, *Microchem J.*, 2020, **158**, 105134.
- 5 H. Zeynali, M. Motaghdifard, B. F. O. Costa, H. Akbari, Z. Moghadam, M. Babaeianfar, M. J. Rashidi, *Arab J Chem.*, 2020, **13**(1), 1429-1439
- 6 Z. X. Jiang, H. Li, R. Ai, Y. Q. Deng, Y. He, *Acs Sustain Chem Eng.*, 2020, **8**(31), 11630-11637.
